# Supplementary material
Source: Springer Nature journal article supplement (https://www.springermedizin.de/resource/supplementary/12990_2009_265_MOESM4_ESM.pdf/9613022)

# No SUR1 antibody

# Preincubation with SUR1 antibody

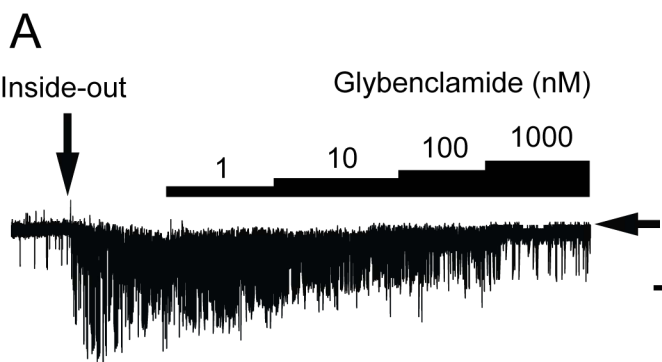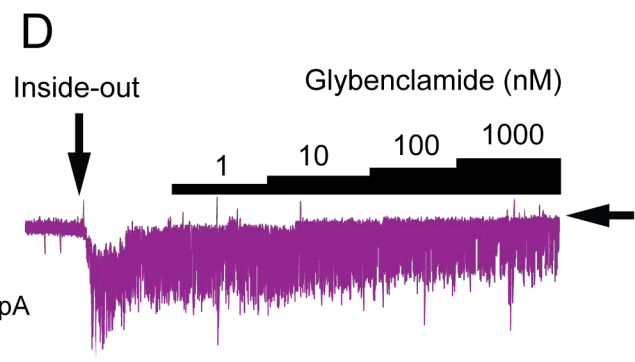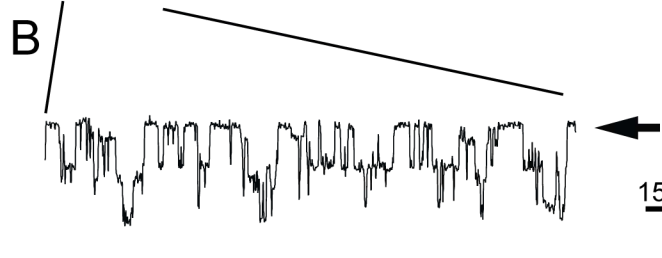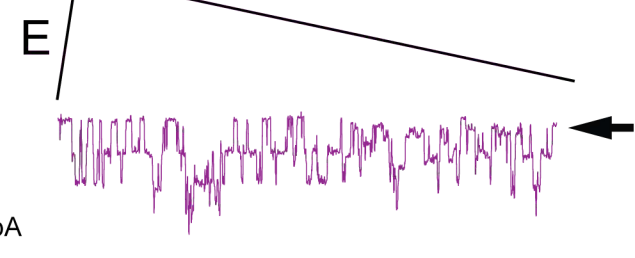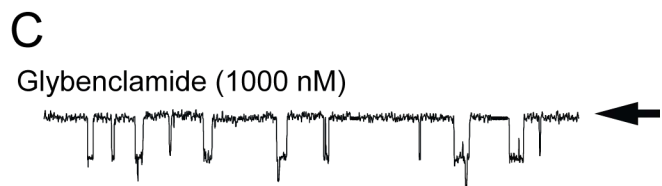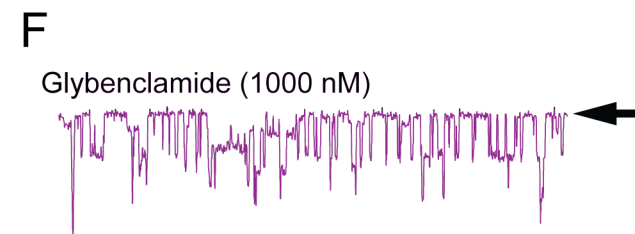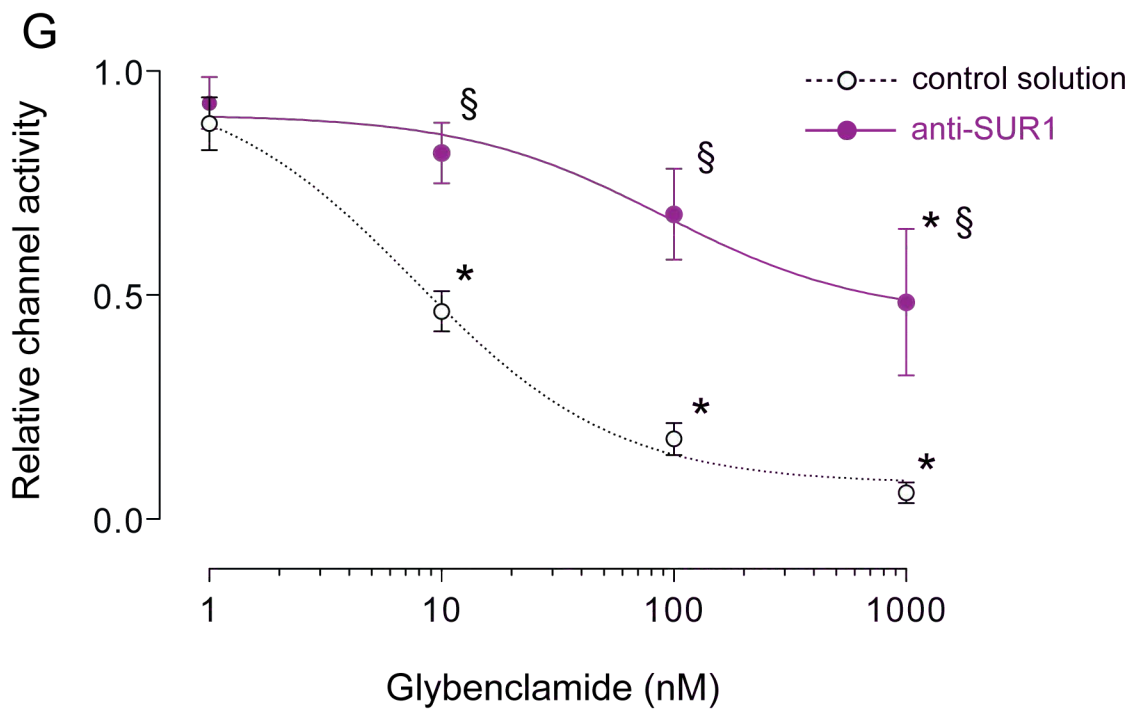

Supplement: MOESM4 [file 9613022]
